# Supplementary material for: Transcriptomics, regulatory syntax, and enhancer identification in mesoderm-induced ESCs at single-cell resolution
Source: PubMed Central journal article supplement (PMC9644345; doi:10.1016/j.celrep.2022.111219), 2022-08-16
Supplement: NIHMS1831963-supplement-1.pdf [file NIHMS1831963-supplement-1.pdf]

**Cell Reports, Volume 40**

**Supplemental information**

**Transcriptomics, regulatory syntax, and enhancer  
identification in mesoderm-induced ESCs  
at single-cell resolution**

**Mamduh Khateb, Jelena Perovanovic, Kyung Dae Ko, Kan Jiang, Xuesong Feng, Natalia Acevedo-Luna, Jérôme Chal, Veronica Ciuffoli, Pavol Genzor, James Simone, Astrid D. Haase, Olivier Pourquié, Stefania Dell'Orso, and Vittorio Sartorelli**

Figure S1

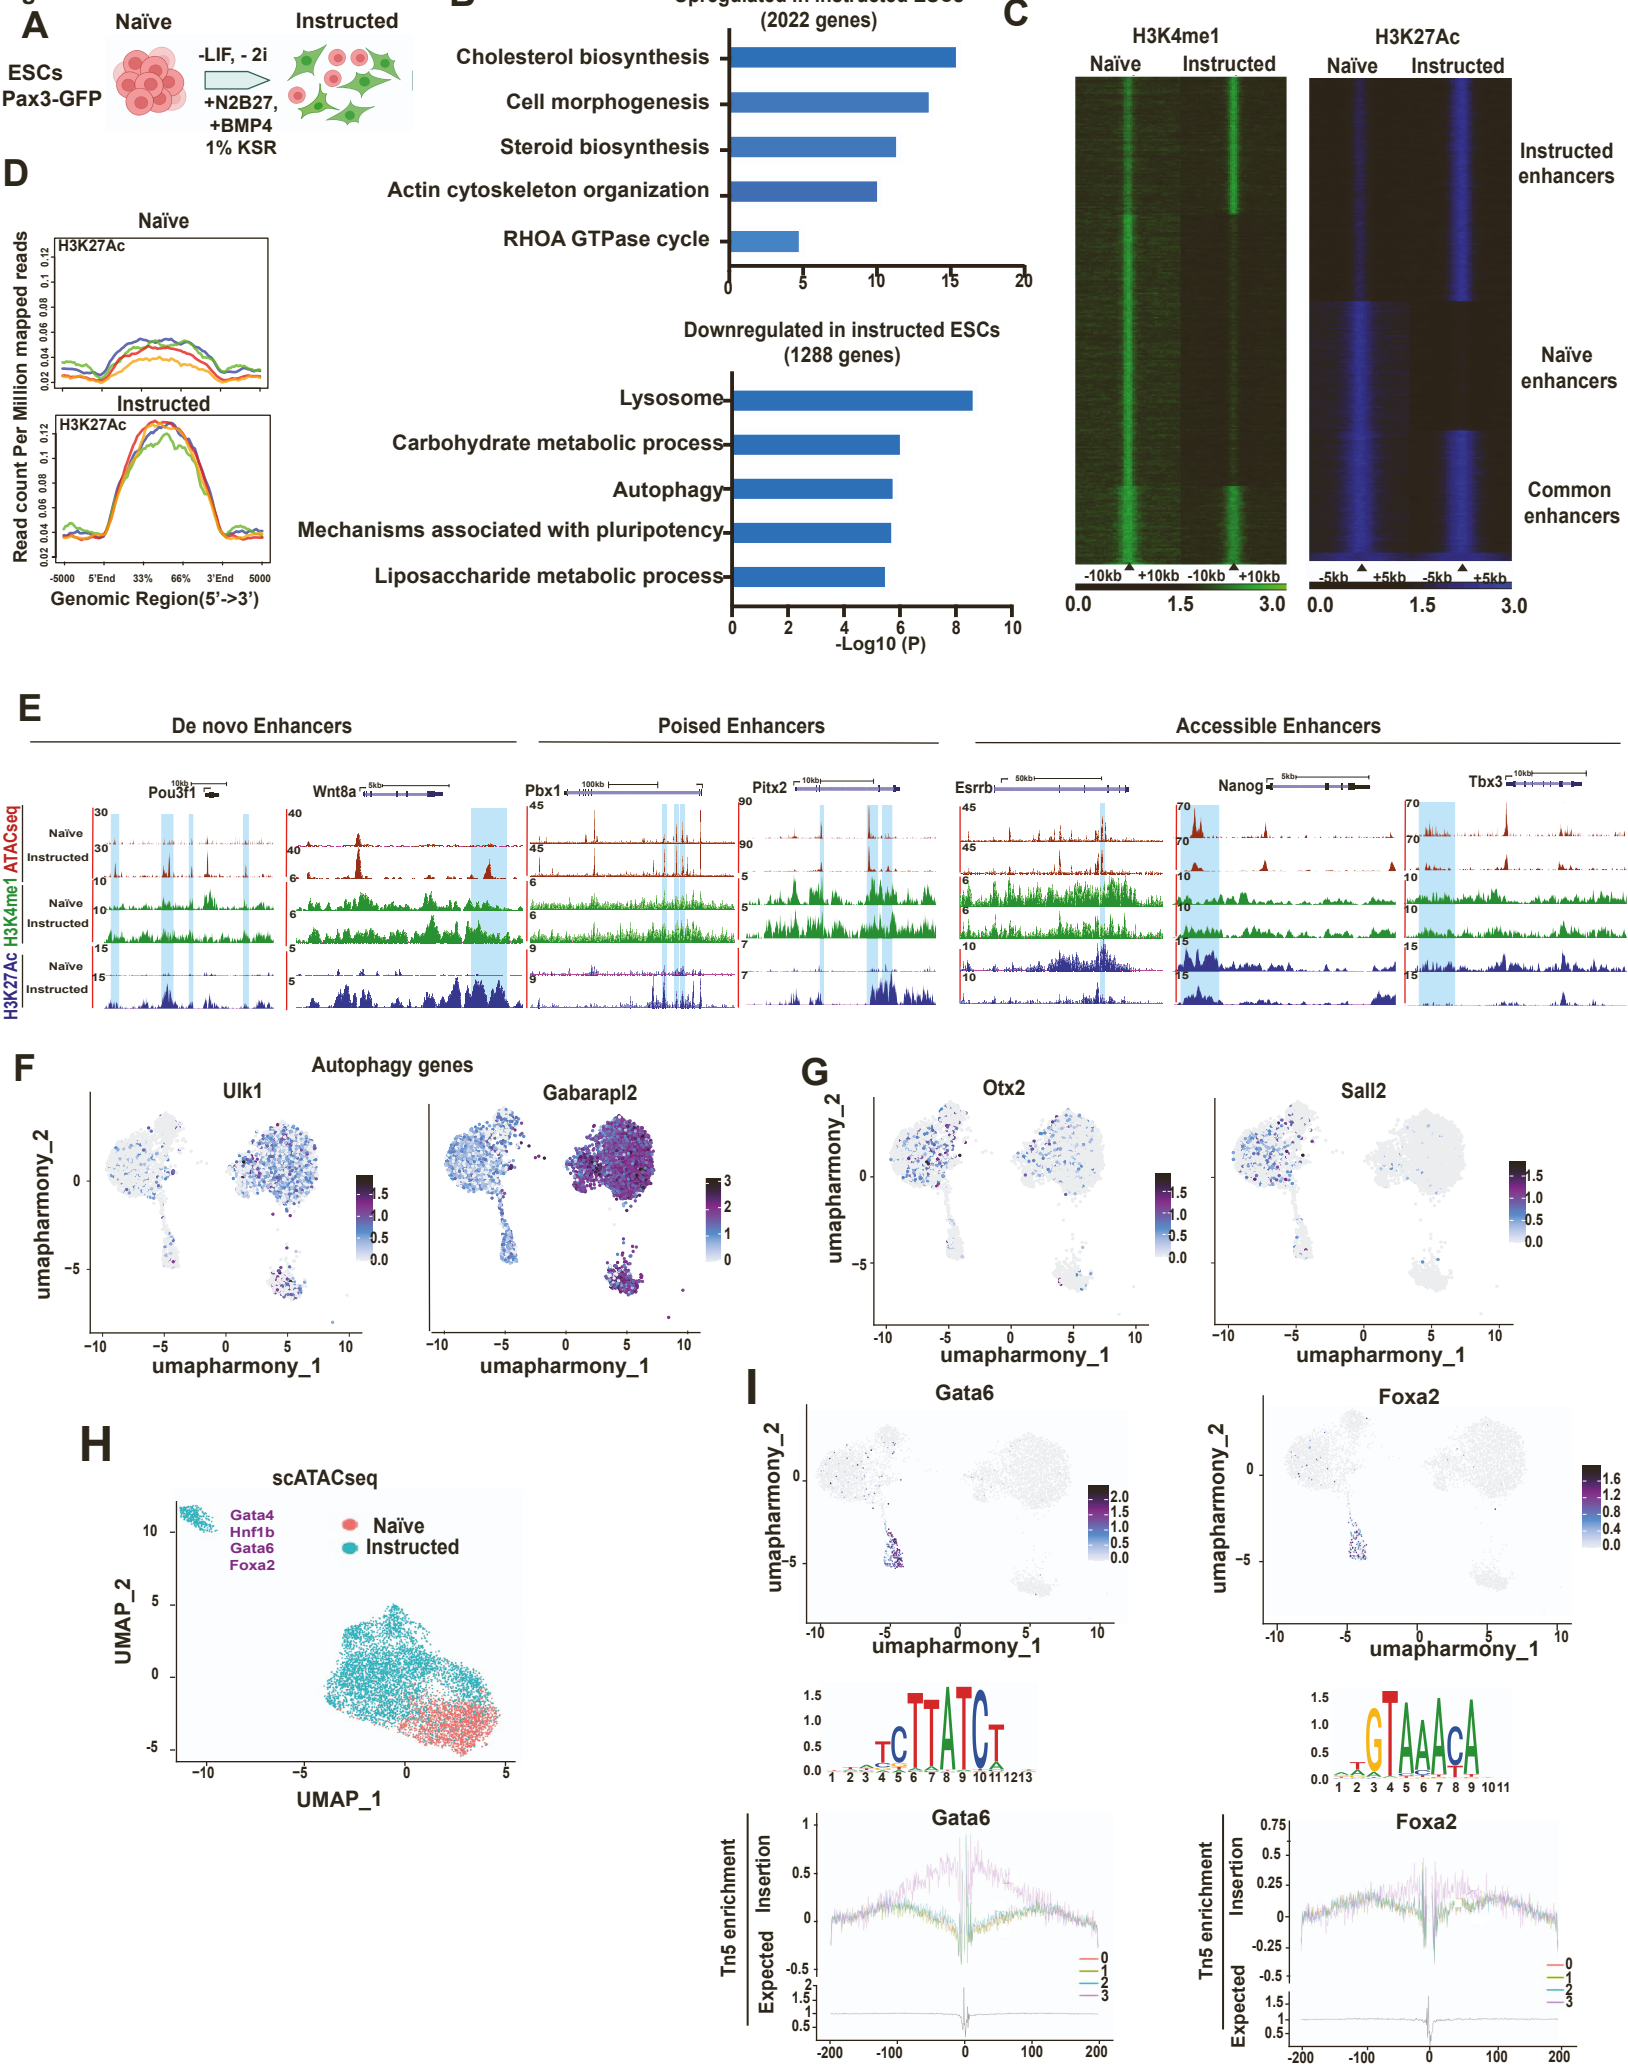

**Supplemental Figure S1 (related to figure 1): Enhancers Modalities and Single Cell Analysis of Transcriptome and Chromatin Accessibility in Naïve and Instructed ESCs.**

(A) Scheme of ESCs Pax3-GFP cultured in N2B27 medium supplemented with Bmp4 and 1% KSR without LIF and 2i for 48 hr (Instructed). (B) Selected gene ontology terms of upregulated (upper panel) and downregulated (lower panel) transcripts in instructed ESCs. (C) H3K4me1 and H3K27ac heatmaps in naïve and instructed ESCs. Interval is -10Kb/+10Kb and -5Kb/+5Kb from the center of the peak signal, respectively. (D) Averaged normalized tag intensities of H3K27ac at naïve and instructed regulatory regions. (E) Genome browser representation of ATAC-seq and ChIP-seq tracks at Pou3f1, Wnt8, Pbx1, Pitx2, Esrrb, Nanog, and Tbx3 loci. (F) Expression of autophagy Ulk1 and Gabarapl2 transcripts in scRNA-seq naïve and instructed ESCs clusters. (G) Expression of Otx2 and Sall2. (H) scATAC-seq of naïve and instructed ESCs clusters. Gata4, Gata6, Hnf1b, and Foxa2 TSS were accessible and footprinted in the indicated instructed cluster. (I) Expression of Gata6 and Foxa2 transcripts (top panel), motif enrichment and overall scATAC-seq Gata6 and Foxa2 footprinting. The x-axis in the footprinting represents nucleotides from the DNA binding motif located at “0”.

Figure S2

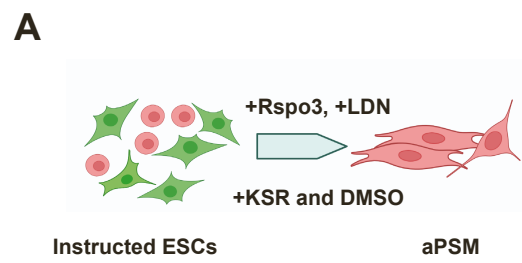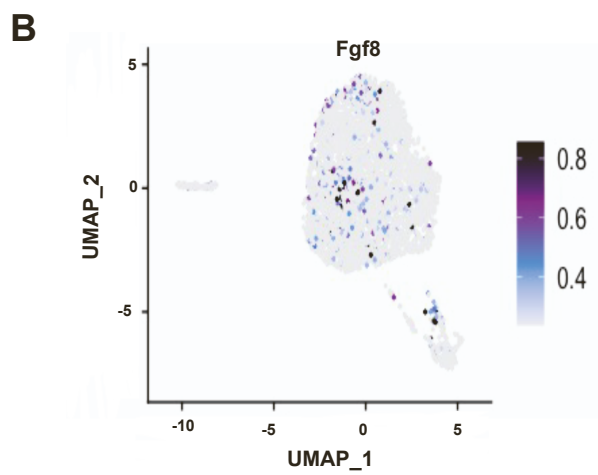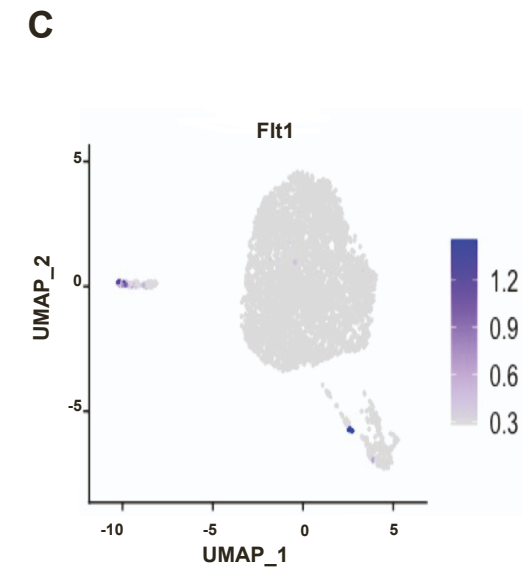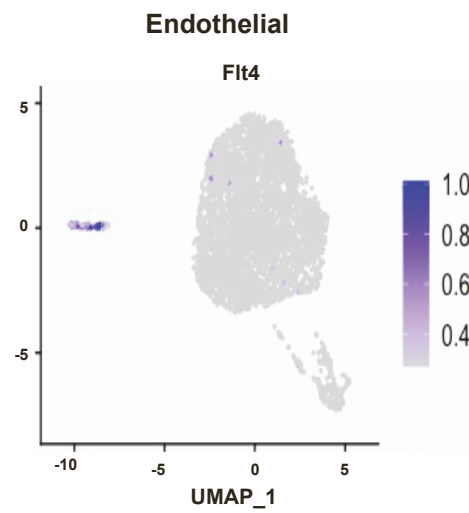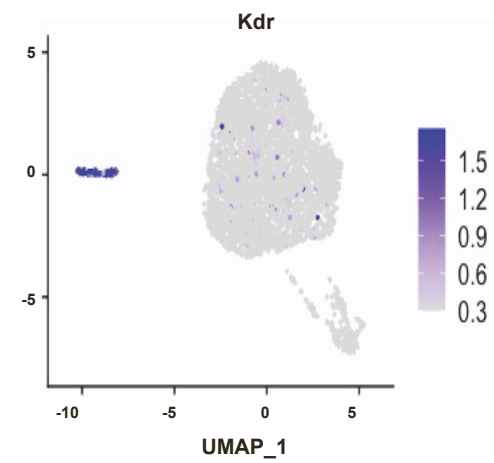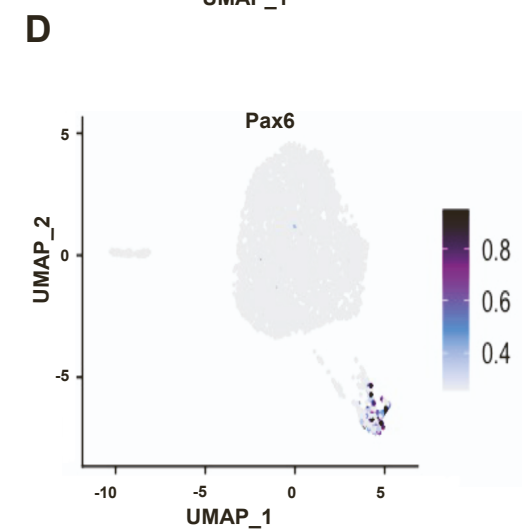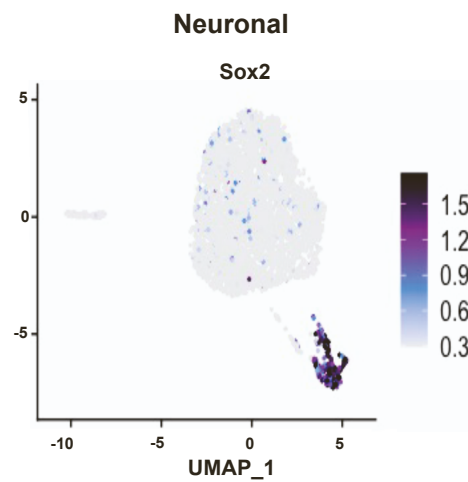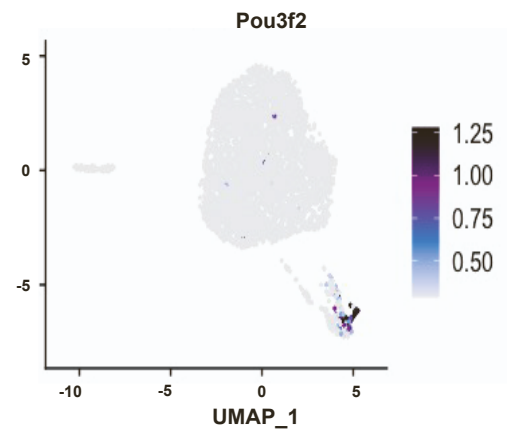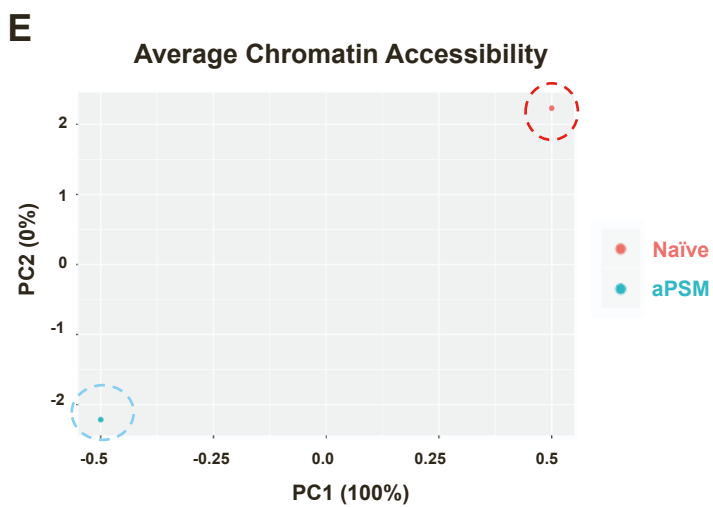



**Supplemental Figure S2 (related to figure 2): Single Cell Gene Expression of Endothelial and Neuronal Factors in Pax3-GFP-Positive ESCs.**

(A) Scheme indicating differentiating medium conditions to instruct ESCs to acquire an anterior presomitic mesoderm (aPSM) fate. (B) Fgf8 expression in aPSM cells. (C) Expression of endothelial transcripts Flt1, Flt4, and Kdr in aPSM cells. (D) Expression of neuronal transcripts Pax6, Sox2, and Pou3f2 in aPSM cells. (E) PCA plot of average chromatin accessibility in naïve ESCs and aPSM cells.

Figure S3

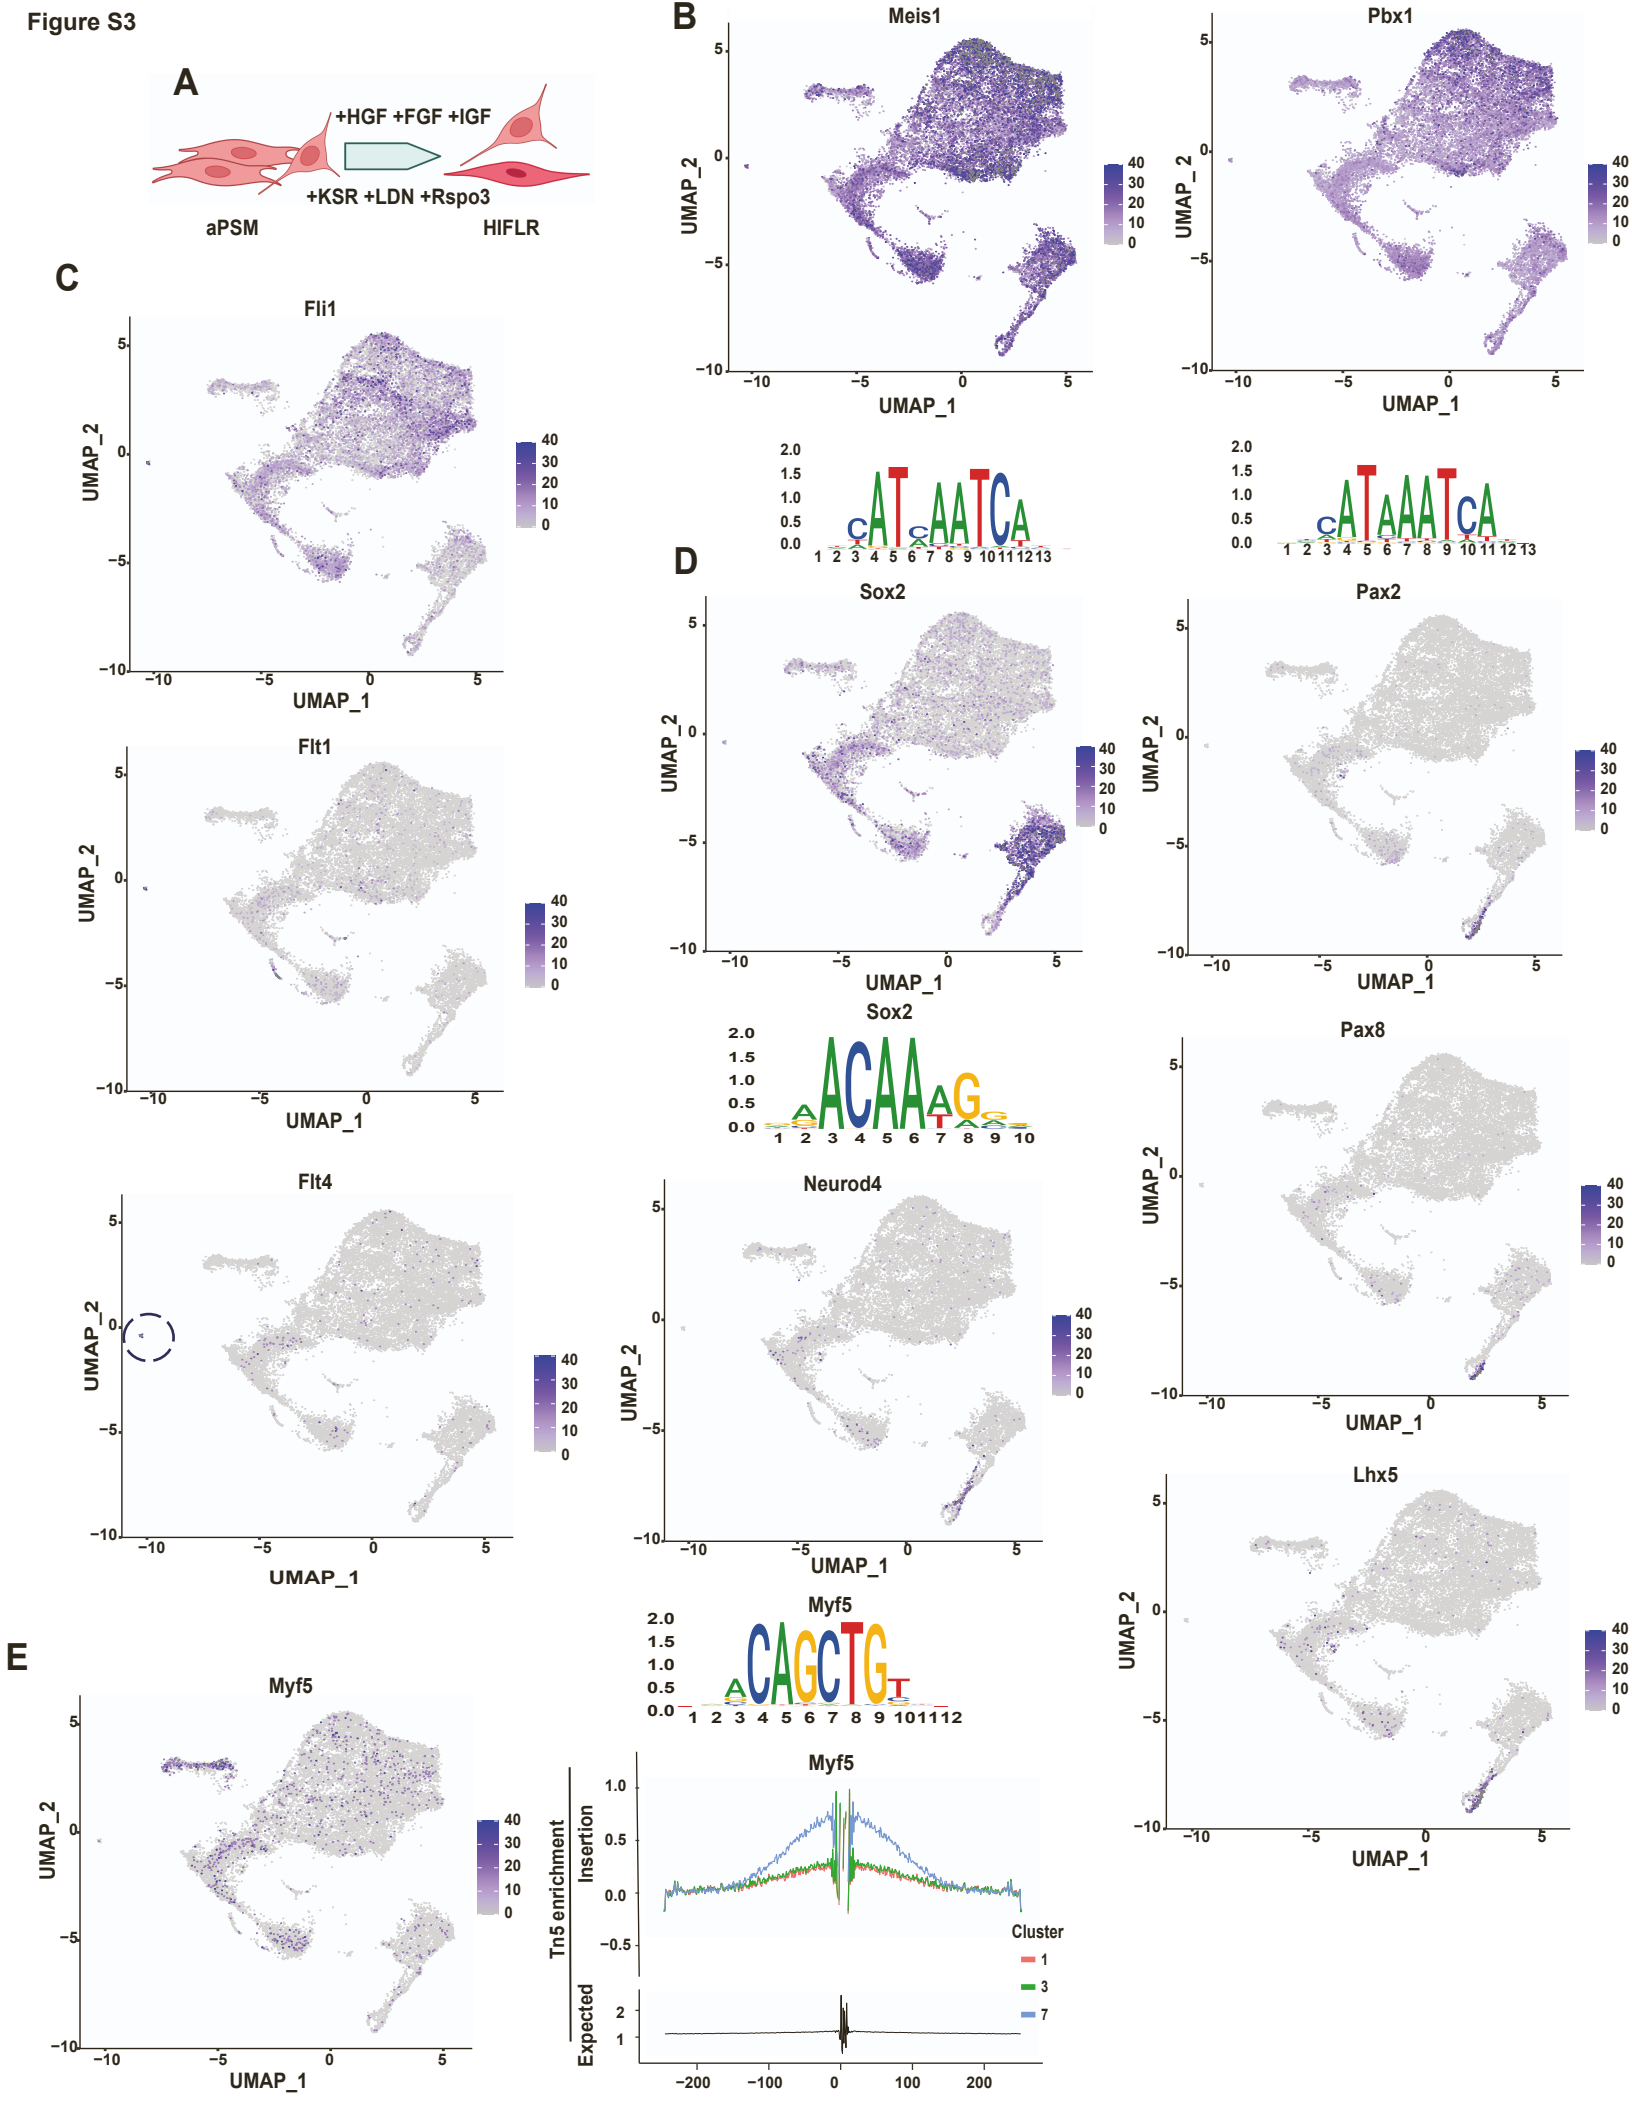

**Supplemental Figure S3 (related to figure 3): Single Cell Omics of Neuronal and Myogenic Markers.**

(A) Scheme indicating medium conditions to induce aPSM cells to acquire an initial myogenic cell fate. (B) Expression and DNA binding motifs for Meis1 and Pbx1. (C) Fli1, Flt1, and Flt4 expression. (D) Expression and DNA binding motif for Sox2, and expression of Pax2, Neurod4, Pax8, and Lhx5. (E) Expression (left panel), DNA binding motif, and footprinting (right panel) for Myf5. The x-axis in the footprinting represents nucleotides from the DNA binding motif located at “0”.

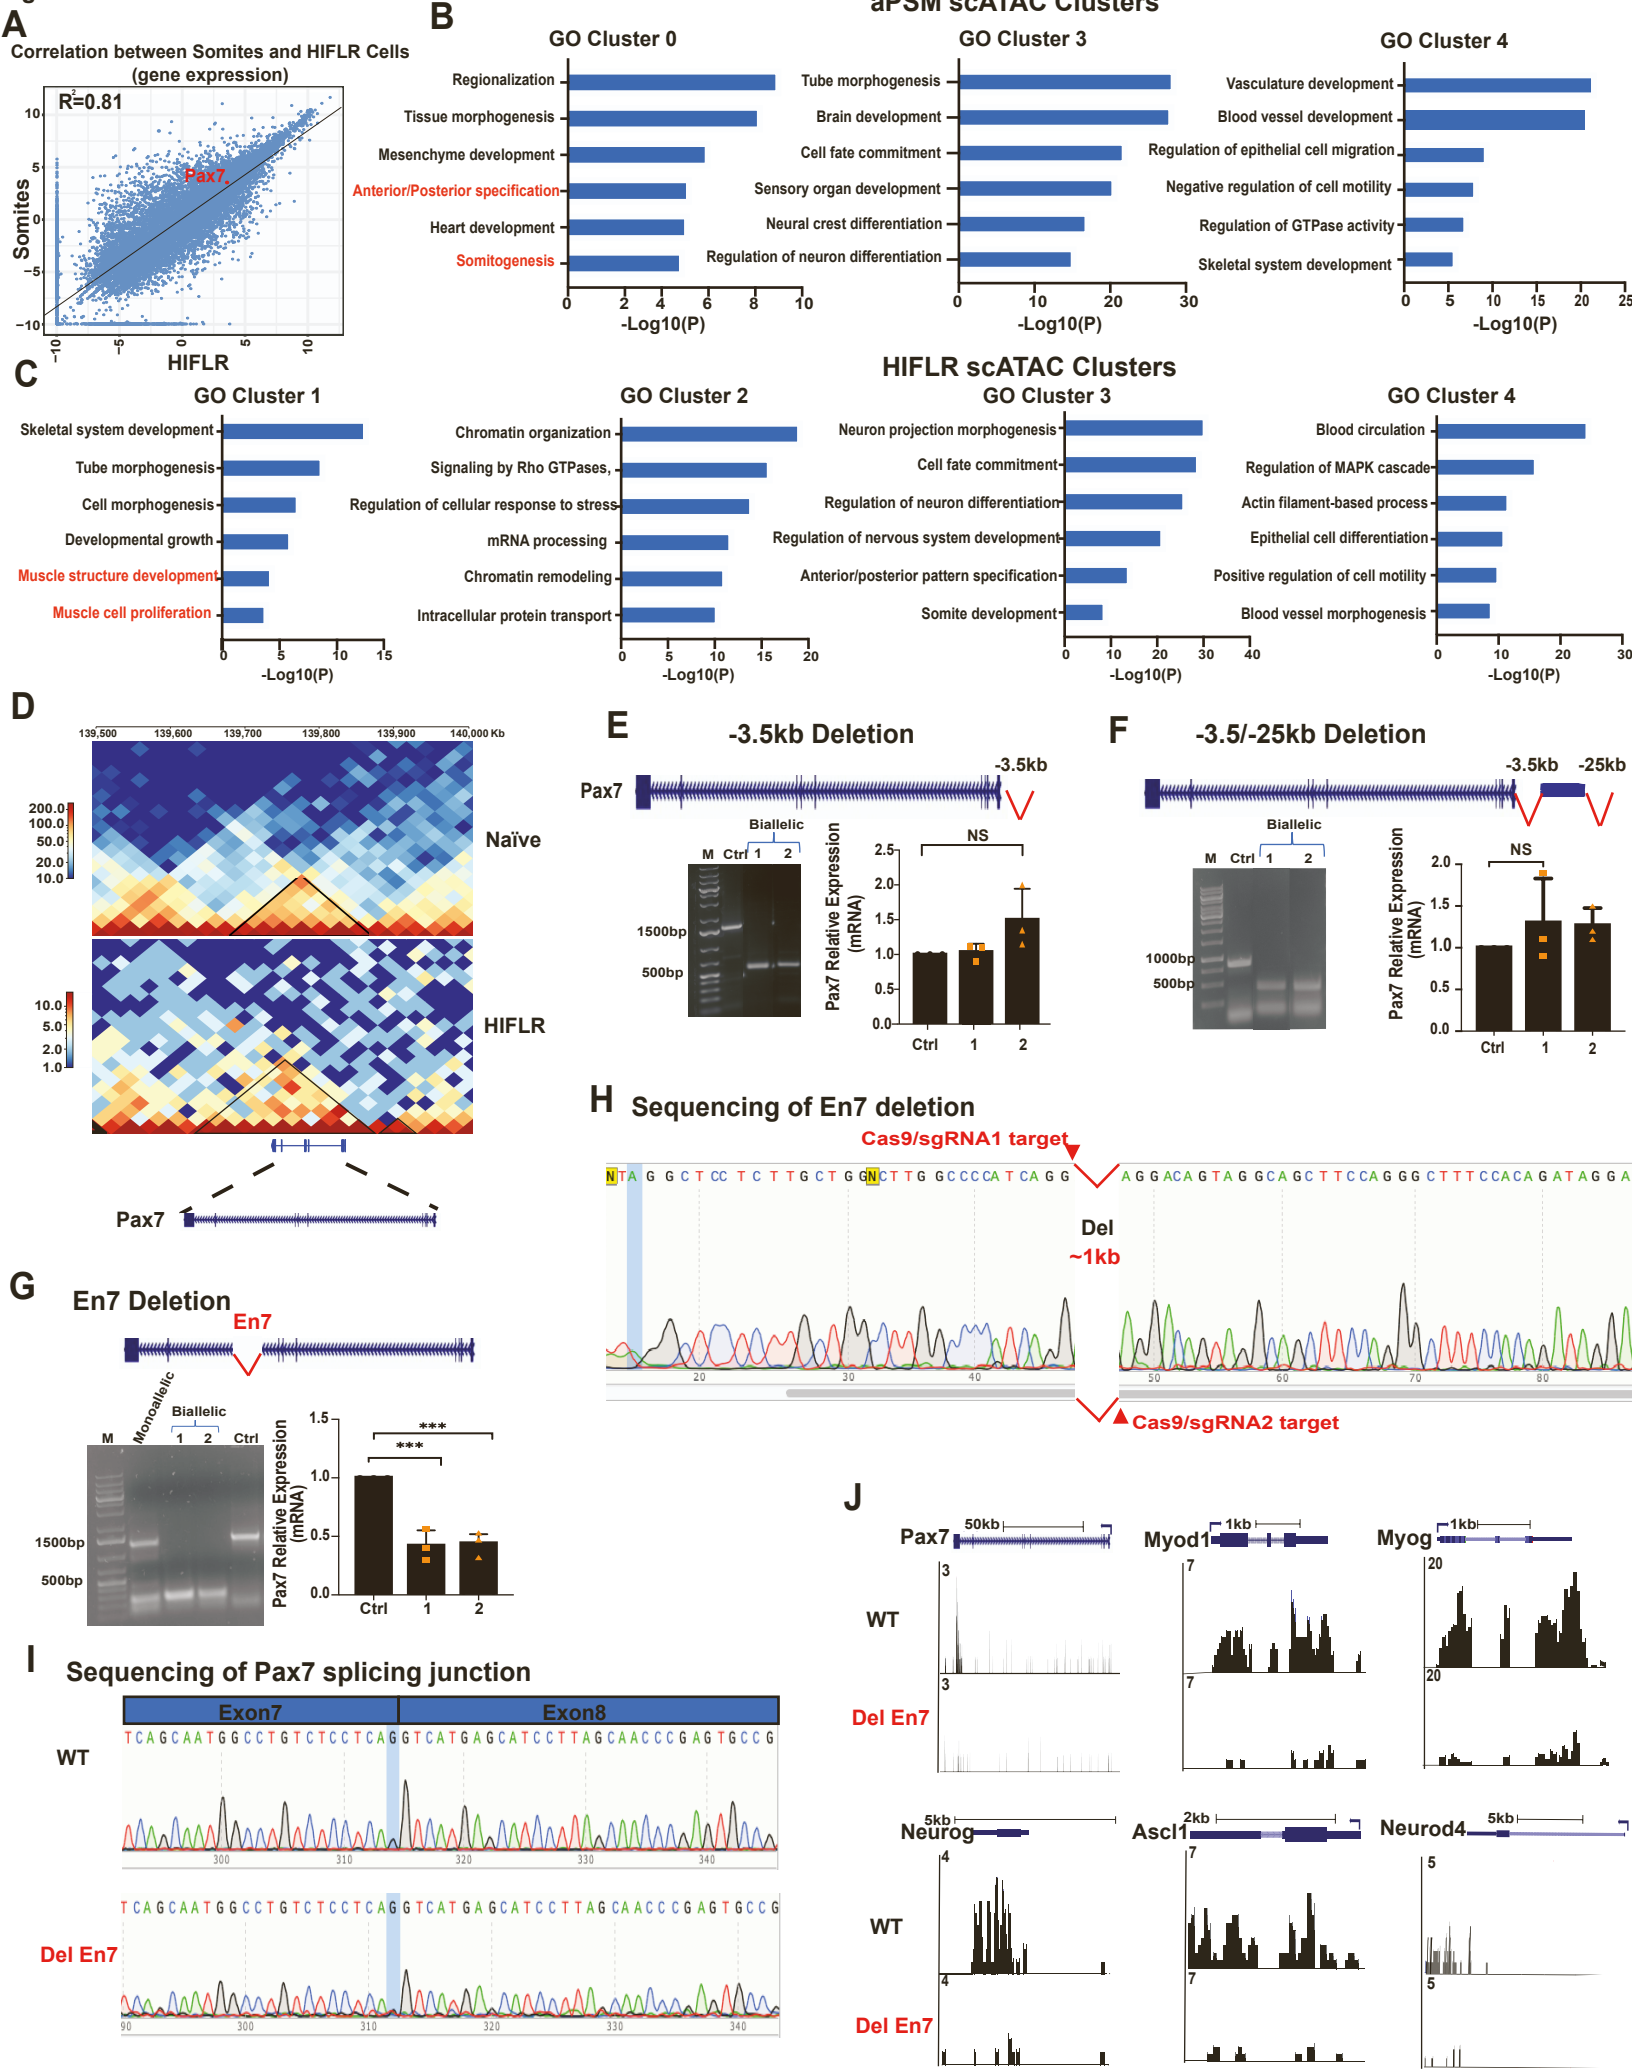

**Supplemental Figure S4 (related to figure 4): Identification and Characterization of Pax7 En7 Enhancer.**

(A) Gene expression correlation plot of somites and HIFLR cells RNA-seq. (B) Selected gene ontology of scATAC-seq clusters for aPSM and (C) for HIFLR cells. (D) Heatmap of contact matrices from Hi-C data indicating that Pax7 locus resides in a topologically associating domain in both naïve ESCs and HIFLR cells. (E) Gel electrophoresis of genomic DNA documenting biallelic deletion of the -3.5Kb Pax7 region. Quantitative PCR was employed to measure Pax7 mRNA expression in control and two independent biallelic deleted ESC clones (n=3, NS, not significant). (F) Gel electrophoresis of genomic DNA documenting biallelic deletion of the -3.5Kb and -25Kb Pax7 regions. Pax7 mRNA expression in control and two independent biallelic deleted -3.5Kb/-25Kb ESC clones (n=3, NS, not significant). (G) Gel electrophoresis of genomic DNA documenting monoallelic (one clone) and biallelic deletion of En7 Pax7 region in two independent clones. Quantitative PCR was employed to measure Pax7 mRNA in control and two independent biallelic E7 deleted ESC clones. Data are represented as mean  $\pm$ SD (n=3). Significance is displayed as  $p < 0.001$  (\*\*\*) . (H) DNA sequencing chromatogram of a En7 deleted ESC clone. (I) Sequencing chromatogram of cDNA derived from RNA of WT (upper) or En7 deleted ESC clone (lower). Pax7 exon 7 and exon 8 sequences are shown. (J) RNA-seq tracks of Pax7, Myod1, Myogenin, Neurogenin, Ascl1, and Neurod4 in control (WT) and En7 deleted ESCs.
